# Supplementary material for: Sex-Related Differences in the Association between Metabolic Syndrome and Gallstone Disease
Source: PubMed Central journal article supplement (PMC7922698; doi:10.3390/ijerph18041958), 2021-02-18
Supplement: ijerph-18-01958-s001.pdf [file ijerph-18-01958-s001.pdf]

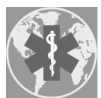

**Table S1.** Univariate analysis of clinical and laboratory variables associated with gallstone disease and cholecystectomy in men.

| Variables                                    | Gallstone Disease   |          | Cholecystectomy      |              |
|----------------------------------------------|---------------------|----------|----------------------|--------------|
|                                              | OR (95% CI)         | <i>p</i> | OR (95% CI)          | <i>p</i>     |
| Age above median                             | 2.219 (1.209-4.072) | 0.019    | 2.652 (1.057-6.659)  | <b>0.038</b> |
| Obesity (BMI $\geq$ 30kg/m <sup>2</sup> )    | 1.832 (1.017-3.300) | 0.044    | 2.168 (0.915-5.135)  | 0.079        |
| Central Obesity (High waist circumference) * | 1.310 (0.727-2.361) | 0.368    | 1.424 (0.613-3.310)  | 0.411        |
| Impaired Fasting Glucose *                   | 2.437 (1.327-4.475) | 0.004    | 4.282 (1.577-11.776) | 0.005        |
| Low HDL *                                    | 1.302 (0.716-2.367) | 0.386    | 2.579 (1.100-6.047)  | 0.029        |
| High triglycerides *                         | 1.072 (0.596-1.930) | 0.817    | 0.707 (0.292-1.708)  | 0.441        |
| Total Cholesterol (mg/dl)                    | 0.994 (0.987-1.002) | 0.163    | 0.993 (0.983-1.004)  | 0.193        |
| LDL Cholesterol (mg/dl)                      | 0.994 (0.986-1.005) | 0.871    | 0.997 (0.985-1.009)  | 0.615        |
| High Blood Pressure *                        | 2.204 (0.952-4.300) | 0.067    | 2.652 (0.772-9.109)  | 0.121        |
| Metabolic Syndrome                           | 2.248 (1.187-4.260) | 0.013    | 5.743 (1.671-19.740) | 0.006        |
| Metabolic Syndrome Score                     | 1.402 (1.110-1.772) | 0.014    | 1.592 (1.117-2.269)  | <b>0.010</b> |
| High HOMA IR                                 | 1.167 (0.632-2.154) | 0.662    | 1.857 (0.761-4.531)  | 0.174        |
| High ALT **                                  | 0.644 (0.344-1.204) | 0.168    | 1.011 (0.427-2.398)  | 0.979        |
| High AST **                                  | 0.831 (0.356-1.941) | 0.669    | 1.173 (0.385-3.577)  | 0.122        |
| High GGT **                                  | 1.090 (0.592-2.009) | 0.728    | 1.716 (0.736-4.001)  | 0.211        |

\* = defined according to ref. [26]; \*\* = values above median; CI = confidence interval; OR= odds ratio

**Table S2.** Univariate analysis of clinical and laboratory variables associated with gallstone disease and cholecystectomy in women.

| Variables                                    | Gallstone Disease   |          | Cholecystectomy     |              |
|----------------------------------------------|---------------------|----------|---------------------|--------------|
|                                              | OR (95% CI)         | <i>p</i> | OR (95% CI)         | <i>p</i>     |
| Age above median                             | 2.330 (1.144-4.349) | 0.010    | 3.096 (1.344-7.131) | <b>0.008</b> |
| Obesity (BMI $\geq$ 30kg/m <sup>2</sup> )    | 1.304 (0.702-2.419) | 0.401    | 1.386 (0.680-2.823) | 0.369        |
| Central Obesity (High waist circumference) * | 1.595 (0.522-4.873) | 0.413    | 1.728 (0.915-3.264) | 0.092        |
| Impaired Fasting Glucose*                    | 0.887 (0.474-1.659) | 0.707    | 0.825 (0.402-1.696) | 0.602        |
| Low HDL*                                     | 0.818 (0.419-1.596) | 0.556    | 0.951 (0.446-2.030) | 0.898        |
| High triglycerides *                         | 0.992 (0.514-1.931) | 0.992    | 1.004 (0.470-2.144) | 0.992        |
| Total Cholesterol (mg/dl)                    | 1.006 (0.998-1.014) | 0.120    | 1.002 (0.993-1.011) | 0.719        |
| LDL Cholesterol (mg/dl)                      | 1.005 (0.997-1.014) | 0.229    | 1.001 (0.991-1.011) | 0.868        |
| High Blood Pressure *                        | 1.942 (0.933-4.041) | 0.076    | 1.697 (0.732-3.933) | 0.218        |
| Metabolic Syndrome                           | 1.265 (0.677-2.366) | 0.461    | 1.519 (0.728-3.169) | 0.265        |
| Metabolic Syndrome Score                     | 1.061 (0.836-1.346) | 0.627    | 1.060 (0.806-1.394) | <b>0.678</b> |
| High HOMA IR                                 | 0.804 (0.406-1.592) | 0.532    | 0.878 (0.406-1.898) | 0.741        |
| High ALT **                                  | 1.479 (0.755-2.897) | 0.254    | 1.671 (0.789-3.541) | 0.671        |
| High AST **                                  | 1.401 (0.604-3.251) | 0.423    | 2.348 (0.985-5.594) | 0.054        |
| High GGT **                                  | 1.763 (0.889-3.496) | 0.104    | 2.323 (1.091-4.946) | 0.029        |
